# Supplementary material
Source: publisher site journal article supplement (https://www.dovepress.com/article/325651)
Supplement: Supplementary file 1 [file get_supplementary_file.php]

Appendix

Appendix 1. Self-Affirmation Manipulation: The value scale method

Half of the participants were randomly assigned to the self-affirmation condition and half were assigned to the no-affirmation condition.

**Participants in the self-affirmation condition:**

Firstly, participants would receive a list of several values, including "business/economics"; "art/music/theatre"; "social life/relationships"; "science/pursuit of knowledge". Next, participants were asked to circle the value that was most important to them personally, and then to write a few paragraphs explaining why this value was important to them. All 13 values are shown below: 1. Artistic ability or appreciation; 2. A sense of humor; 3. Relationships with friends; 4. Relationships with family; 5. A free and unfettered life; 6. Social skills; 7. Career success; 8. Musical ability or appreciation; 9. Good health; 10. Money; 11. Academic performance; 12. Pure love; 13. A happy marriage.

**Participants in the non-affirmation condition:**

Firstly, participants received a list of several fruits. Next, participants were asked to circle the fruit that their favorite personally, and then to write a few paragraphs explaining why this fruit was their favorite fruit. All 13 fruits are shown below: 1. Apple; 2. Banana; 3. Mango; 4. Grapes; 5. Fragrant pear; 6. Peach; 7. Strawberry; 8. Papaya; 9. Dragon fruit; 10. Durian; 11. The watermelon; 12. The pineapple; 13. Grapefruit.
